# Supplementary material for: Assessing yield stability of heat-tolerant lentil genotypes across multiple hotspot regions in Bangladesh
Source: Research Square preprint supplement (doi:10.21203/rs.3.rs-7736936/v1), 2025-11-05
Supplement: Supplementary file 1 [file 1e069ccb4da1d465d8ed3da3.docx]

**Table 1** Analysis of variance for grain yield (kg ha-1) in 6 genotypes of *Lens culinaris* Medik evaluated over 4 environments in Bangladesh.

| **Source** | **Degree of**  **Freedom** | **Sum of Square** | **Mean of Square** | **F value** | **Probability level (>F)** | **Proportion** |
| --- | --- | --- | --- | --- | --- | --- |
| Environment | 3 | 5544831.90 | 1848277.298 | 189.405808 | 9.092627e-08 | *NA* |
| Rep(Env) | 8 | 78066.34 | 9758.293 | 3.082264 | 8.398451e-03 | *NA* |
| Genotypes | 5 | 1164480.82 | 232896.164 | 73.562818 | 4.319171e-19 | *NA* |
| Genotypes:Environment | 15 | 4770018.97 | 318001.264 | 100.444201 | 6.981189e-27 | *NA* |
| PC1 | 7 | 3640890.37 | 520127.196 | 164.290000 | 0.000000e+00 | 76.3 |
| PC2 | 5 | 747171.96 | 149434.392 | 47.200000 | 0.000000e+00 | 15.7 |
| PC3 | 3 | 381956.63 | 127318.877 | 40.220000 | 0.000000e+00 | 8.0 |
| Residuals | 40 | 126637.98 | 3165.949 | *NA* | *NA* | *NA* |
| Total | 86 | 16454054.97 | 191326.221 | *NA* | *NA* | *NA* |

Note: PC1; Principal Component1, PC2; Principal Component2, PC3; Principal Component3.

**Table 2** Disease reaction of the genotypes against root rot disease (based on 1-9 disease rating scale) and *Stemphylim* blight disease (based on 0-5 disease rating scale) at natural field condition during 2023-24.

| Genotype | Disease rating score of root rot | | Disease rating scale of *Stemphylium* blight | |
| --- | --- | --- | --- | --- |
| Rating score | Reaction | Rating score | Reaction |
| BLX 09015 | 47.059a | S | 3.58ab | MS |
| BLX 05002-3 | 9.468d | MR | 2.75c | MR |
| LRIL 21-1-1-1-1 | 23.834c | S | 2.25d | MR |
| LRIL 21-1-1-1-1-6 | 50.774a | HS | 3.75a | MS |
| BLX 05002-6 | 37.111b | MS | 2.50cd | MR |
| BARI Masur-8 | 38.814b | MS | 3.25b | MS |
| CV% | 9.74 | - | 16.49 | - |
| LSD | 3.9680** | - | 0.41** | - |

**Table 3** The mean performance of phenological duration, yield-contributing traits, and yield across six *Lens culinaris* Medik genotypes under four different environments during 2023-24.

| Genotypes | FPP | DF | DM | PH | BPP | PPP | HSW | GY | SY |
| --- | --- | --- | --- | --- | --- | --- | --- | --- | --- |
| G-1 | 98.48 | 44.50 | 85.92 | 35.37 | 2.45 | 40.84 | 2.88 | 902.23 | 1106.13 |
| G-2 | 140.13 | 47.67 | 89.75 | 34.91 | 2.83 | 62.65 | 2.35 | 1259.04 | 1388.08 |
| G-3 | 123.79 | 51.17 | 91.67 | 34.18 | 2.75 | 54.17 | 2.26 | 1085.16 | 1443.42 |
| G-4 | 96.33 | 44.83 | 88.42 | 33.78 | 2.82 | 47.83 | 2.38 | 1185.15 | 1500.83 |
| G-5 | 122.57 | 50.33 | 91.08 | 34.98 | 3.00 | 61.55 | 2.38 | 1281.97 | 1508.79 |
| G-6 | 121.44 | 51.42 | 91.42 | 35.75 | 3.17 | 74.47 | 2.38 | 1180.16 | 1440.08 |
| Mean | 117.12 | 48.32 | 89.71 | 34.83 | 2.84 | 56.92 | 2.44 | 1148.95 | 1397.89 |
| SE | 5.23 | 1.43 | 0.66 | 0.54 | 0.07 | 3.92 | 0.04 | 48 | 56.77 |
| Std. Dev | 44.08 | 12.06 | 5.57 | 4.56 | 0.58 | 33.05 | 0.37 | 403 | 478.32 |
| CV | 37.9 | 25.14 | 6.25 | 13.2 | 20.68 | 58.48 | 15.13 | 35 | 34.46 |
| Min | 36.2 (G-1 in BSL) | 31 (G-3 in BSL) | 80 (G-1 in JOY) | 27 (G-4 in RAJ) | 1.8 (G-2 in BSL) | 35.2 (G-3 in BSL) | 1.8 (G-2 in BSL) | 321 (G-1 in ISH) | 386 (G-1 in ISH) |
| Max | 223 (G-2 in ISH) | 66 (G-3 in RAJ) | 99 (G-6 in ISH) | 43.4 (G-2 in BSL) | 4 (G-4 in JOY) | 136 (G-6 in ISH) | 3.6 (G-1 in JOY) | 1980 (G-6 in RAJ) | 2250 (G-6 in RAJ) |
| MinENV | BSL (60.93) | BSL (33.78) | JOY (84.44) | RAJ (31) | JOY (2.56) | JOY (32.33) | ISH (2.21) | ISH (943.69) | ISH (1144.06) |
| MaxENV | ISH (160.72) | RAJ (64.39) | ISH (95.28) | BSL (38.6) | RAJ (3.24) | ISH (107.68) | JOY (2.61) | RAJ (1625.56) | RAJ (1930) |
| MinGEN | G-4 (96.33) | G-1 (44.5) | G-1 (85.92) | G-4 (33.77) | G-1 (2.45) | G-1 (40.84) | G-3 (2.27) | G-1 (902.22) | G-1 (1106.12) |
| MaxGEN | G-2 (140.13) | G-6 (51.42) | G-3 (91.67) | G-6 (35.75) | G-6 (3.17) | G-6 (74.47) | G-1 (2.88) | G-5 (1281.97) | G-5 (1508.79) |

Note: G-1(BLX 09015), G-2(BLX 05002-3), G-3(LRIL21-1-1-1-1), G-4(LRIL21-1-1-1-1-6), G-5(BLX 05002-6), G-6(BARI Masur-8), FPP final plant population per square meter, DF days to 50% flowering(days), DM days to maturity (days), PH plant height (cm), 3BPP branches per plant, PPP pods per plant, HSW hundred seed weight (g), GY yield (kg/ha), SY straw yield (kg/ha), DSc disease score, CV co-efficient of variation, SE. standard error, Std. Dev. standard deviation, Max. maximum, Min. minimum. ENV environment, GEN genotype with LSD test at p > 0.05.

**Table 4** List of genotypes with their pedigree and present status

| SL. No. | Name of the genotypes | Pedigree/Source | Status |
| --- | --- | --- | --- |
| 01. | BLX 09015 | PRC, Bangladesh | Heat tolerant |
| 02. | BLX 05002-3 | PRC, Bangladesh | Heat tolerant |
| 03. | LRIL 21-1-1-1-1 | ICARDA, Morocco | Germplasm |
| 04. | LRIL-21-1-1-1-1-6 | ICARDA, Morocco | Germplasm |
| 05. | BLX 05002-6 | PRC, Bangladesh | Heat tolerant |
| 06. | BARI Masur-8 (Check) | PRC, Bangladesh | Released variety |

**Table 5** Salient features of the experimental sites along with weather data (monthly average maximum, minimum temperature, relative humidity, sunshine hours in every day and total rainfall) during crop season 2023-24 at four locations in Bangladesh.

| **Location** |  | | | | | **Weather variable** | | | | | | |
| --- | --- | --- | --- | --- | --- | --- | --- | --- | --- | --- | --- | --- |
| **AEZ** | **Altitude**  **(m)** | **Geographical Position** | **Soil Texture** | **Soil fertility level and soil pH** | **Monthly average maximum, minimum temperature, relative humidity, sunshine hours in very dayand at total rainfall (mm)/month during crop season 2023-24 at different locations** | | | | | | |
| **Weather parameter** | **November** | **December** | **January** | **February** | **March** | **April** |
| **2023** | **2023** | **2024** | **2024** | **2024** | **2024** |
| Ishurdi | 11 | 16.00 | 24◦030 N  89◦050 E | CL | Low  7.36 | Tmax (0C)  Tmim (0C)  RH(%)  Sunshine hours  Rainfall(mm) | 30.10  18.60  88.97  6.95  0.00 | 26.10  14.00  90.16  6.70  3.80 | 22.20  10.80  89.18  5.12  0.00 | 27.40  13.80  82.10  7.22  1.30 | 31.90  17.80  66.61  7.69  27.70 | 39.20  24.50  63.57  8.37  0.00 |
| Barishal | 13 | 2.10 | 22◦480 N  90◦370 E | SC | High  7.30 | Tmax (0C)  Tmim (0C)  RH(%)  Sunshine hours  Rainfall(mm) | 23.11  16.09  59.37  4.84  80.80 | 25.29  16.23  77.20  5.01  4.00 | 22.36  12.97  76.54  4.39  11.oo | 27.45  16.71  73.77  5.77  54.30 | 31.40  20.10  73.79  6.54  21.00 | 34.79  26.61  75.07  7.42  24.00 |
| Gazipur | 28 | 14.00 | 22◦4600N  90◦3900 E | SCL | Low  7.50 | Tmax (0C)  Tmim (0C)  RH(%)  Sunshine hours  Rainfall(mm) | 31.17  19.88  79.50  7.92  28.00 | 26.88  16.19  86.00  4.80  48.00 | 21.73  13.72  78.00  3.71  438.00 | 28.09  16.08  73.50  6.57  8.07 | 31.56  18.09  65.5  5.67  10.70 | 36.89  24.07  63.00  8.05  17.00 |
| Barind, Rajshahi | 11 | 16.00 | 24.1700 N  89.1400E | VCL, terrace | Low | Tmax (0C)  Tmim (0C)  RH(%)  Sunshine hours  Rainfall(mm) | 30.34  18.72  90.47  6.91  3.40 | 26.25  18.72  90.24  5.53  37.50 | 21.99  10.78  88.92  3.35  0.00 | 27.44  14.11  81.19  6.45  14.70 | 71.79  17.90  75.98  7.23  23.20 | 39.07  24.00  66.45  8.19  0.20 |

Note: CL = Clay loam; SC = Silty clay; SL = Silty loam; SCL = Silty clay loam; VCL = Very clay loam; Tmax(0C) = Maximum Temperature in degree Celsius; Tmim (0C) = Minimum Temperature in degree Celsius; RH(%) = Relative Humidity in percentage, Rainfall(mm) = Rainfall in millimeter.

**Table 6**. Sowing time of the different locations of the experiment during 2023-24

| Locations | Date of sowing |
| --- | --- |
| Barind, Rajshahi | 11 December, 2023 |
| RARS, BARI, Rahmatpur, Barishal | 06 December, 2023 |
| PRC, BARI, Ishurdi, Pabna | 17 November, 2023 |
| PRSS, BARI, Gazipur | 10 December, 2023 |

**Table 7** Rating scale for reaction of lentil genotypes against root rot disease.

| Rating scale | Incidence percent of root rot | Reaction |
| --- | --- | --- |
| 1 | 1% or less mortality of plants | Resistant (R) |
| 3 | 2-10% mortality of plants | Moderately Resistant (MR) |
| 5 | 11-20% mortality of plants | Moderately Susceptible (MS) |
| 7 | 21-50% mortality of plants | Susceptible (S) |
| 9 | Above 50% mortality of plants | Highly Susceptible (HS) |

**Table 8** Rating scale for reaction of lentil genotypes against Stemphylium blight disease.

| Rating scale | Incidence percent of root rot | Reaction |
| --- | --- | --- |
| 0 | No infection | Immune |
| 1 | Few scattered leaves infected and no twig blighted | Resistant (R) |
| 2 | 5–10% leaflets infected and/or scattered 1% twig blighted | Moderately Resistant (MR) |
| 3 | 11–20% leaflets infected and/or 1–5% twig blighted | Moderately Susceptible (MS) |
| 4 | 21–50% leaflets infected and/or 6–10% twig blighted | Susceptible (S) |
| 5 | Above 50% leaflets infected /or more than 10% twig blighted | Highly Susceptible (HS) |
