# Supplementary material for: Assessing yield stability of heat-tolerant lentil genotypes across multiple hotspot regions in Bangladesh
Source: Research Square preprint supplement (doi:10.21203/rs.3.rs-7736936/v1), 2025-11-05
Supplement: Supplementary file 2 [file 6a03a319fefbbfd296c1c445.xlsx]

## Sheet: Sheet1
REP	GEN	ENV	FPP	DF	DM	PH	BPP	PPP	HSW	GY	SY	DSc
1	G-1	RAJ	120.8	63	91	38	2.6	48	2.32	1550	1880	4
2	G-1	RAJ	128.4	62	93	35	2.4	37.5	2.42	1470	1750	4
3	G-1	RAJ	119	63	93	36.8	2.6	51.6	2.35	1500	1900	3
1	G-1	BSL	47.5	33	82	31.8	2.6	22.4	2.97	502	613	4
2	G-1	BSL	48.8095	34	81	37.8	2.2	23.2	2.81	393	473	5
3	G-1	BSL	36.1905	33	81	34	2.6	29.2	2.81	433	560	4
1	G-1	ISH	130	47	89	40.2	2.6	70.4	2.69	324.219	396	4
2	G-1	ISH	129	47	89	40.4	2.2	67.8	2.89	321	386	3
3	G-1	ISH	129	47	90	40.4	2.6	70	3	325	419	3
1	G-1	JOY	112	36	81	29	2	24	3.52	1420	1674	3
2	G-1	JOY	104	35	81	31	3	21	3.57	1312.5	1576	3
3	G-1	JOY	77	34	80	30	2	25	3.18	1276	1646.5	3
1	G-2	RAJ	165.2	65	93	31	3.8	58	2.25	1730	1980	2
2	G-2	RAJ	120.6	65	95	28	3.4	44	2.28	1850	1760	3
3	G-2	RAJ	118	64	97	32.5	2.8	65	2.38	1690	1980	3
1	G-2	BSL	92.8571	37	84	43.2	2.8	45.2	1.78	1257	1446	2
2	G-2	BSL	73.8095	32	84	43.4	2.4	47.4	2.81	1317	1331	4
3	G-2	BSL	88.0952	37	84	36.6	1.8	42.8	2.81	1105	1305	3
1	G-2	ISH	210	51	95	38.4	3	115.6	2.17	1281.25	1474	2
2	G-2	ISH	218	51	96	38.8	2.8	120	2.15	1365	1378	3
3	G-2	ISH	223	52	96	40	3.2	118.8	2.16	1310	1546	3
1	G-2	JOY	102	38	84	28	2	33	2.55	764	878	2
2	G-2	JOY	122	40	83	29	3	32	2.5	725	733	4
3	G-2	JOY	148	40	86	30	3	30	2.37	714.2	846	2
1	G-3	RAJ	124	66	97	27.6	3	48	2.38	1660	2100	2
2	G-3	RAJ	109	66	96	31.5	3.4	38	2.48	1500	2080	3
3	G-3	RAJ	128	66	95	28.8	2.6	53	2.18	1490	1960	2
1	G-3	BSL	60	31	87	35.8	3	47.4	1.83	1198	1521	2
2	G-3	BSL	52.381	35	86	35.8	3.4	5.2	2.81	1046	1475	3
3	G-3	BSL	57.1429	33	87	42.8	2.6	46.8	2.81	1115	1485	2
1	G-3	ISH	196	58	97	38.8	3	105.6	2.05	917.969	1166	2
2	G-3	ISH	189	57	97	37.4	3.4	105.4	1.91	912	1285	3
3	G-3	ISH	180	58	96	37.6	2.6	108.6	1.91	930	1237	2
1	G-3	JOY	137	47	84	31	2	33	2.36	746.8	949	2
2	G-3	JOY	97	47	88	32	2	30	2.17	725	1023	2
3	G-3	JOY	156	50	90	31	2	29	2.18	781.2	1040	2
1	G-4	RAJ	129	63	90	27	3.2	40	2.311	1480	1480	3
2	G-4	RAJ	131	64	92	29.5	2.8	29	2.28	1370	1780	4
3	G-4	RAJ	118	64	93	30.2	3.4	27.5	2.35	1350	1820	3
1	G-4	BSL	51.1905	31	84	33.2	1.8	40.6	2.37	700	843	3
2	G-4	BSL	36.9048	31	84	34	2.8	37.4	2.81	693	913	5
3	G-4	BSL	43.8095	35	84	41.8	2.6	41.6	2.81	655	891	5
1	G-4	ISH	123	48	97	39	1.8	92.8	1.92	1089.84	1308	3
2	G-4	ISH	122	48	96	37.8	2.8	97.8	2.03	1133	1486	5
3	G-4	ISH	113	47	98	39.8	2.6	96.2	2.04	1142	1554	4
1	G-4	JOY	100	36	82	32	3	24	2.55	1596.5	1916	3
2	G-4	JOY	89	35	80	31	4	24	2.5	1500	1964	4
3	G-4	JOY	99	36	81	30	3	23	2.59	1512.5	2055	3
1	G-5	RAJ	162	64	93	28	3.8	55	2.38	1800	1860	2
2	G-5	RAJ	84	63	94	27.8	3.4	40	2.32	1590	1980	3
3	G-5	RAJ	89	65	93	29.5	3.6	48	2.28	1660	2050	3
1	G-5	BSL	79.0476	35	88	40	3.8	41	1.89	1512	1558	2
2	G-5	BSL	83.0952	31	88	41.4	2.4	43.8	2.81	1486	1860	3
3	G-5	BSL	85.7143	36	88	41	2.6	41.6	2.81	1531	1945	3
1	G-5	ISH	155	55	96	38.6	3.8	123.8	2.14	1058.59	1091	2
2	G-5	ISH	155	55	98	36.8	2.4	115.4	2.28	1016	1271	3
3	G-5	ISH	145	55	96	37.6	3.2	123	2.21	970	1232	2
1	G-5	JOY	95	47	86	32	2	36	2.49	951.9	981	2
2	G-5	JOY	167	50	85	34	3	36	2.45	967.7	1210	3
3	G-5	JOY	171	48	88	33	2	35	2.49	840.4	1067.5	2
1	G-6	RAJ	136	65	94	31.66	3.8	48	2.45	1980	2000	3
2	G-6	RAJ	140	65	95	32.6	3.8	66	2.68	1810	2130	4
3	G-6	RAJ	128	66	97	32.5	4	72	2.58	1780	2250	3
1	G-6	BSL	48.5714	37	88	39.2	2.8	54	1.92	852	870	3
2	G-6	BSL	59.5238	35	85	43	2.8	49.6	2.81	1048	1237	4
3	G-6	BSL	52.1429	32	88	40	3.6	50	2.81	834	1077	4
1	G-6	ISH	160	57	99	37	2.8	135.8	2.11	955.469	975	3
2	G-6	ISH	162	57	95	37.4	2.8	136	2.01	981	1158	3
3	G-6	ISH	154	56	95	37.6	3.6	135.2	2.02	954	1231	4
1	G-6	JOY	150	48	88	34	2	50	2.31	1000	1921	2
2	G-6	JOY	117	49	86	32	3	46	2.3	1017.5	1201	3
3	G-6	JOY	150	50	87	32	3	51	2.5	950	1231	3

## Sheet: Location Mean
REP	GEN	ENV	FPP	DF	DM	PH	BPP	PPP	HSW	GY	SY	DSc		FPP	DF	DM	PH	BPP	PPP	HSW	GY	SY	DSc
1	G-1	RAJ	120.8	63	91	38	2.6	48	2.32	1550	1880	4	G-1	98.475	44.5	85.9167	35.3667	2.45	40.8417	2.8775	902.227	1106.12	3.58333
2	G-1	RAJ	128.4	62	93	35	2.4	37.5	2.42	1470	1750	4	G-2	140.13	47.6667	89.75	34.9083	2.83333	62.65	2.35083	1259.04	1388.08	2.75
3	G-1	RAJ	119	63	93	36.8	2.6	51.6	2.35	1500	1900	3	G-3	123.794	51.1667	91.6667	34.175	2.75	54.1667	2.25583	1085.16	1443.42	2.25
1	G-1	BSL	47.5	33	82	31.8	2.6	22.4	2.97	502	613	4	G-4	96.3254	44.8333	88.4167	33.775	2.81667	47.825	2.38008	1185.15	1500.83	3.75
2	G-1	BSL	48.8095	34	81	37.8	2.2	23.2	2.81	393	473	5	G-5	122.571	50.3333	91.0833	34.975	3	61.55	2.37917	1281.97	1508.79	2.5
3	G-1	BSL	36.1905	33	81	34	2.6	29.2	2.81	433	560	4	G-6	121.437	51.4167	91.4167	35.7467	3.16667	74.4667	2.375	1180.16	1440.08	3.25
1	G-1	ISH	130	47	89	40.2	2.6	70.4	2.69	324.219	396	4
2	G-1	ISH	129	47	89	40.4	2.2	67.8	2.89	321	386	3
3	G-1	ISH	129	47	90	40.4	2.6	70	3	325	419	3
1	G-1	JOY	112	36	81	29	2	24	3.52	1420	1674	3
2	G-1	JOY	104	35	81	31	3	21	3.57	1312.5	1576	3
3	G-1	JOY	77	34	80	30	2	25	3.18	1276	1646.5	3
			98.475	44.5	85.9167	35.3667	2.45	40.8417	2.8775	902.227	1106.12	3.58333
1	G-2	RAJ	165.2	65	93	31	3.8	58	2.25	1730	1980	2
2	G-2	RAJ	120.6	65	95	28	3.4	44	2.28	1850	1760	3
3	G-2	RAJ	118	64	97	32.5	2.8	65	2.38	1690	1980	3
1	G-2	BSL	92.8571	37	84	43.2	2.8	45.2	1.78	1257	1446	2
2	G-2	BSL	73.8095	32	84	43.4	2.4	47.4	2.81	1317	1331	4
3	G-2	BSL	88.0952	37	84	36.6	1.8	42.8	2.81	1105	1305	3
1	G-2	ISH	210	51	95	38.4	3	115.6	2.17	1281.25	1474	2
2	G-2	ISH	218	51	96	38.8	2.8	120	2.15	1365	1378	3
3	G-2	ISH	223	52	96	40	3.2	118.8	2.16	1310	1546	3
1	G-2	JOY	102	38	84	28	2	33	2.55	764	878	2
2	G-2	JOY	122	40	83	29	3	32	2.5	725	733	4
3	G-2	JOY	148	40	86	30	3	30	2.37	714.2	846	2
			140.13	47.6667	89.75	34.9083	2.83333	62.65	2.35083	1259.04	1388.08	2.75
1	G-3	RAJ	124	66	97	27.6	3	48	2.38	1660	2100	2
2	G-3	RAJ	109	66	96	31.5	3.4	38	2.48	1500	2080	3
3	G-3	RAJ	128	66	95	28.8	2.6	53	2.18	1490	1960	2
1	G-3	BSL	60	31	87	35.8	3	47.4	1.83	1198	1521	2
2	G-3	BSL	52.381	35	86	35.8	3.4	5.2	2.81	1046	1475	3
3	G-3	BSL	57.1429	33	87	42.8	2.6	46.8	2.81	1115	1485	2
1	G-3	ISH	196	58	97	38.8	3	105.6	2.05	917.969	1166	2
2	G-3	ISH	189	57	97	37.4	3.4	105.4	1.91	912	1285	3
3	G-3	ISH	180	58	96	37.6	2.6	108.6	1.91	930	1237	2
1	G-3	JOY	137	47	84	31	2	33	2.36	746.8	949	2
2	G-3	JOY	97	47	88	32	2	30	2.17	725	1023	2
3	G-3	JOY	156	50	90	31	2	29	2.18	781.2	1040	2
			123.794	51.1667	91.6667	34.175	2.75	54.1667	2.25583	1085.16	1443.42	2.25
1	G-4	RAJ	129	63	90	27	3.2	40	2.311	1480	1480	3
2	G-4	RAJ	131	64	92	29.5	2.8	29	2.28	1370	1780	4
3	G-4	RAJ	118	64	93	30.2	3.4	27.5	2.35	1350	1820	3
1	G-4	BSL	51.1905	31	84	33.2	1.8	40.6	2.37	700	843	3
2	G-4	BSL	36.9048	31	84	34	2.8	37.4	2.81	693	913	5
3	G-4	BSL	43.8095	35	84	41.8	2.6	41.6	2.81	655	891	5
1	G-4	ISH	123	48	97	39	1.8	92.8	1.92	1089.84	1308	3
2	G-4	ISH	122	48	96	37.8	2.8	97.8	2.03	1133	1486	5
3	G-4	ISH	113	47	98	39.8	2.6	96.2	2.04	1142	1554	4
1	G-4	JOY	100	36	82	32	3	24	2.55	1596.5	1916	3
2	G-4	JOY	89	35	80	31	4	24	2.5	1500	1964	4
3	G-4	JOY	99	36	81	30	3	23	2.59	1512.5	2055	3
			96.3254	44.8333	88.4167	33.775	2.81667	47.825	2.38008	1185.15	1500.83	3.75
1	G-5	RAJ	162	64	93	28	3.8	55	2.38	1800	1860	2
2	G-5	RAJ	84	63	94	27.8	3.4	40	2.32	1590	1980	3
3	G-5	RAJ	89	65	93	29.5	3.6	48	2.28	1660	2050	3
1	G-5	BSL	79.0476	35	88	40	3.8	41	1.89	1512	1558	2
2	G-5	BSL	83.0952	31	88	41.4	2.4	43.8	2.81	1486	1860	3
3	G-5	BSL	85.7143	36	88	41	2.6	41.6	2.81	1531	1945	3
1	G-5	ISH	155	55	96	38.6	3.8	123.8	2.14	1058.59	1091	2
2	G-5	ISH	155	55	98	36.8	2.4	115.4	2.28	1016	1271	3
3	G-5	ISH	145	55	96	37.6	3.2	123	2.21	970	1232	2
1	G-5	JOY	95	47	86	32	2	36	2.49	951.9	981	2
2	G-5	JOY	167	50	85	34	3	36	2.45	967.7	1210	3
3	G-5	JOY	171	48	88	33	2	35	2.49	840.4	1067.5	2
			122.571	50.3333	91.0833	34.975	3	61.55	2.37917	1281.97	1508.79	2.5
1	G-6	RAJ	136	65	94	31.66	3.8	48	2.45	1980	2000	3
2	G-6	RAJ	140	65	95	32.6	3.8	66	2.68	1810	2130	4
3	G-6	RAJ	128	66	97	32.5	4	72	2.58	1780	2250	3
1	G-6	BSL	48.5714	37	88	39.2	2.8	54	1.92	852	870	3
2	G-6	BSL	59.5238	35	85	43	2.8	49.6	2.81	1048	1237	4
3	G-6	BSL	52.1429	32	88	40	3.6	50	2.81	834	1077	4
1	G-6	ISH	160	57	99	37	2.8	135.8	2.11	955.469	975	3
2	G-6	ISH	162	57	95	37.4	2.8	136	2.01	981	1158	3
3	G-6	ISH	154	56	95	37.6	3.6	135.2	2.02	954	1231	4
1	G-6	JOY	150	48	88	34	2	50	2.31	1000	1921	2
2	G-6	JOY	117	49	86	32	3	46	2.3	1017.5	1201	3
3	G-6	JOY	150	50	87	32	3	51	2.5	950	1231	3
			121.437	51.4167	91.4167	35.7467	3.16667	74.4667	2.375	1180.16	1440.08	3.25
