# Supplementary material for: Assessing yield stability of heat-tolerant lentil genotypes across multiple hotspot regions in Bangladesh
Source: Research Square preprint supplement (doi:10.21203/rs.3.rs-7736936/v1), 2025-11-05
Supplement: Supplementary file 3 [file dcb0e84db8456260cbc4ff21.xlsx]

## Sheet: Sheet1
Loc	Rep	Geno	FPP	DF	DM	PH	BPP	PPP	HSWT	GY	SY	DS
Barind	1	1	120.8	63	91	38	2.6	48	2.32	1550	1880	4
Barind	1	2	165.2	65	93	31	3.8	58	2.25	1730	1980	2
Barind	1	3	124	66	97	27.6	3	48	2.38	1660	2100	2
Barind	1	4	129	63	90	27	3.2	40	2.311	1480	1480	3
Barind	1	5	162	64	93	28	3.8	55	2.38	1800	1860	2
Barind	1	6	136	65	94	31.66	3.8	48	2.45	1980	2000	3
Barind	2	1	128.4	62	93	35	2.4	37.5	2.42	1470	1750	4
Barind	2	2	120.6	65	95	28	3.4	44	2.28	1850	1760	3
Barind	2	3	109	66	96	31.5	3.4	38	2.48	1500	2080	3
Barind	2	4	131	64	92	29.5	2.8	29	2.28	1370	1780	4
Barind	2	5	84	63	94	27.8	3.4	40	2.32	1590	1980	3
Barind	2	6	140	65	95	32.6	3.8	66	2.68	1810	2130	4
Barind	3	1	119	63	93	36.8	2.6	51.6	2.35	1500	1900	3
Barind	3	2	118	64	97	32.5	2.8	65	2.38	1690	1980	3
Barind	3	3	128	66	95	28.8	2.6	53	2.18	1490	1960	2
Barind	3	4	118	64	93	30.2	3.4	27.5	2.35	1350	1820	3
Barind	3	5	89	65	93	29.5	3.6	48	2.28	1660	2050	3
Barind	3	6	128	66	97	32.5	4	72	2.58	1780	2250	3
Barishal	1	1	47.5	33	82	31.8	2.6	22.4	2.97	502	613	4
Barishal	1	2	92.8571	37	84	43.2	2.8	45.2	1.78	1257	1446	2
Barishal	1	3	60	31	87	35.8	3	47.4	1.83	1198	1521	2
Barishal	1	4	51.1905	31	84	33.2	1.8	40.6	2.37	700	843	3
Barishal	1	5	79.0476	35	88	40	3.8	41	1.89	1512	1558	2
Barishal	1	6	48.5714	37	88	39.2	2.8	54	1.92	852	870	3
Barishal	2	1	48.8095	34	81	37.8	2.2	23.2	2.81	393	473	5
Barishal	2	2	73.8095	32	84	43.4	2.4	47.4	2.81	1317	1331	4
Barishal	2	3	52.381	35	86	35.8	3.4	5.2	2.81	1046	1475	3
Barishal	2	4	36.9048	31	84	34	2.8	37.4	2.81	693	913	5
Barishal	2	5	83.0952	31	88	41.4	2.4	43.8	2.81	1486	1860	3
Barishal	2	6	59.5238	35	85	43	2.8	49.6	2.81	1048	1237	4
Barishal	3	1	36.1905	33	81	34	2.6	29.2	2.81	433	560	4
Barishal	3	2	88.0952	37	84	36.6	1.8	42.8	2.81	1105	1305	3
Barishal	3	3	57.1429	33	87	42.8	2.6	46.8	2.81	1115	1485	2
Barishal	3	4	43.8095	35	84	41.8	2.6	41.6	2.81	655	891	5
Barishal	3	5	85.7143	36	88	41	2.6	41.6	2.81	1531	1945	3
Barishal	3	6	52.1429	32	88	40	3.6	50	2.81	834	1077	4
Ishurdi	1	1	130	47	89	40.2	2.6	70.4	2.69	324.219	396	4
Ishurdi	1	2	210	51	95	38.4	3	115.6	2.17	1281.25	1474	2
Ishurdi	1	3	196	58	97	38.8	3	105.6	2.05	917.969	1166	2
Ishurdi	1	4	123	48	97	39	1.8	92.8	1.92	1089.84	1308	3
Ishurdi	1	5	155	55	96	38.6	3.8	123.8	2.14	1058.59	1091	2
Ishurdi	1	6	160	57	99	37	2.8	135.8	2.11	955.469	975	3
Ishurdi	2	1	129	47	89	40.4	2.2	67.8	2.89	321	386	3
Ishurdi	2	2	218	51	96	38.8	2.8	120	2.15	1365	1378	3
Ishurdi	2	3	189	57	97	37.4	3.4	105.4	1.91	912	1285	3
Ishurdi	2	4	122	48	96	37.8	2.8	97.8	2.03	1133	1486	5
Ishurdi	2	5	155	55	98	36.8	2.4	115.4	2.28	1016	1271	3
Ishurdi	2	6	162	57	95	37.4	2.8	136	2.01	981	1158	3
Ishurdi	3	1	129	47	90	40.4	2.6	70	3	325	419	3
Ishurdi	3	2	223	52	96	40	3.2	118.8	2.16	1310	1546	3
Ishurdi	3	3	180	58	96	37.6	2.6	108.6	1.91	930	1237	2
Ishurdi	3	4	113	47	98	39.8	2.6	96.2	2.04	1142	1554	4
Ishurdi	3	5	145	55	96	37.6	3.2	123	2.21	970	1232	2
Ishurdi	3	6	154	56	95	37.6	3.6	135.2	2.02	954	1231	4
Joydebpur	1	1	112	36	81	29	2	24	3.52	1420	1674	3
Joydebpur	1	2	102	38	84	28	2	33	2.55	764	878	2
Joydebpur	1	3	137	47	84	31	2	33	2.36	746.8	949	2
Joydebpur	1	4	100	36	82	32	3	24	2.55	1596.5	1916	3
Joydebpur	1	5	95	47	86	32	2	36	2.49	951.9	981	2
Joydebpur	1	6	150	48	88	34	2	50	2.31	1000	1921	2
Joydebpur	2	1	104	35	81	31	3	21	3.57	1312.5	1576	3
Joydebpur	2	2	122	40	83	29	3	32	2.5	725	733	4
Joydebpur	2	3	97	47	88	32	2	30	2.17	725	1023	2
Joydebpur	2	4	89	35	80	31	4	24	2.5	1500	1964	4
Joydebpur	2	5	167	50	85	34	3	36	2.45	967	1210	3
Joydebpur	2	6	117	49	86	32	3	46	2.3	1017.5	1201	3
Joydebpur	3	1	77	34	80	30	2	25	3.18	1276	1646	3
Joydebpur	3	2	148	40	86	30	3	30	2.37	714.2	846	2
Joydebpur	3	3	156	50	90	31	2	29	2.18	781.2	1040	2
Joydebpur	3	4	99	36	81	30	3	23	2.59	1512.5	2055	3
Joydebpur	3	5	171	48	88	33	2	35	2.49	840.4	1067.5	2
Joydebpur	3	6	150	50	87	32	3	51	2.5	950	1231	3
